# Supplementary material for: Ciguatoxin-Producing Dinoflagellate Gambierdiscus in the Beibu Gulf: First Report of Toxic Gambierdiscus in Chinese Waters
Source: MDPI journal article supplement (doi:10.3390/toxins13090643), 2021-09-10
Supplement: s1 [file s1]

# Supplementary Materials: Ciguatoxin-Producing Dinoflagellate *Gambierdiscus* in the Beibu Gulf: First Report of Toxic *Gambierdiscus* in Chinese Waters

Yixiao Xu, Xilin He, Wai Hin Lee, Leo Lai Chan, Douding Lu, Pengbin Wang, Xiaoping Tao, Huiling Li and Kefu Yu

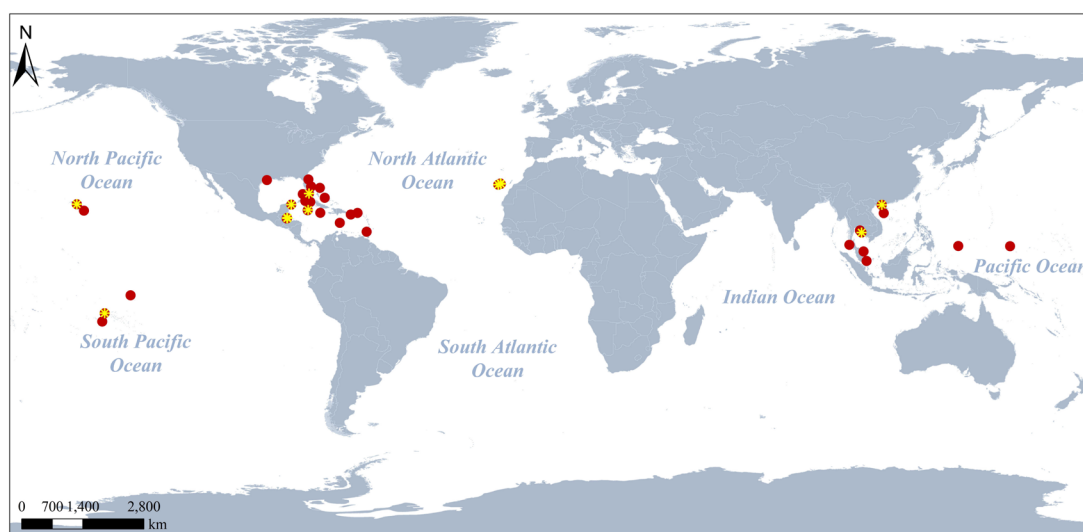

**Figure S1.** Global distribution map of *Gambierdiscus caribaeus*. Red dots indicate the presence of *G. caribaeus*, and yellow asterisks indicate the presence of *G. caribaeus* containing ciguatoxin (CTX)-like toxicity.

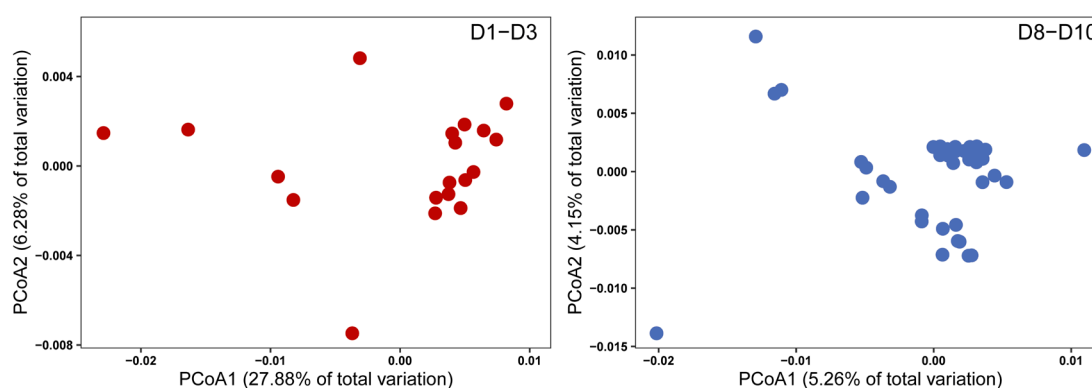

**Figure S2.** Principal coordinate analysis (PCoA) based on the *p* distance matrices of *Gambierdiscus caribaeus* D1–D3 LSU rDNA and D8–D10 LSU rDNA sequences downloaded from the NCBI database.

**Table S1.** The *p* distance (uncorrected genetic distance) comparison of *Gambierdiscus* D1–D3 LSU rDNA, D8–D10 LSU rDNA, and SSU rDNA sequences.

|            | <i>G. caribaeus</i> (WZ)                 | <i>G. caribaeus</i> (WZ)- <i>G. caribaeus</i> (Tree) | <i>G. caribaeus</i> (WZ)- <i>G. carpenteri</i> (Tree) | <i>G. caribaeus</i> (WZ)- <i>G. jejuensis</i> (Tree) |
|------------|------------------------------------------|------------------------------------------------------|-------------------------------------------------------|------------------------------------------------------|
| D1–D3 LSU  | 0.007 ± 0.002 (0.002–0.010) <sup>a</sup> | 0.013 ± 0.005 (0.007–0.022) <sup>b</sup>             | 0.069 ± 0.005 (0.064–0.077) <sup>c</sup>              | 0.060 ± 0.006 (0.052–0.068) <sup>d</sup>             |
| D8–D10 LSU | 0.006 ± 0.005 (0.000–0.011) <sup>e</sup> | 0.010 ± 0.003 (0.005–0.013) <sup>f</sup>             | 0.022 ± 0.005 (0.016–0.031) <sup>g</sup>              | 0.029 ± 0.005 (0.022–0.039) <sup>h</sup>             |
| SSU        | 0.019 ± 0.009 (0.002–0.035) <sup>i</sup> | 0.014 ± 0.009 (0.001–0.032) <sup>j</sup>             | 0.028 ± 0.008 (0.018–0.035) <sup>k</sup>              | 0.031 ± 0.007 (0.022–0.038) <sup>l</sup>             |

WZ: Weizhou Island strains; Tree: strains included in Figure 4–6. <sup>a</sup> MW489525–MW489529. <sup>b</sup> MW489525–MW489529, EF202931, EF202932, EF202934, and EF202936. <sup>c</sup> MW489525–MW489529, EF202938, and EF202939. <sup>d</sup> MW489525–MW489529, MH827558, and MH827561. <sup>e</sup> MW485226–MW485230. <sup>f</sup> MW485226–MW485230, EU498045, EU498053, EU498058, EU498063, and EU498069. <sup>g</sup> MW485226–MW485230, EU498038, EU498039, and EU498042. <sup>h</sup> MW485226–MW485230, MH827555, and MH827562. <sup>i</sup> MW485232–MW485236. <sup>j</sup> MW485232–MW485236, EF202915, EF202917, EF202919, EF202921, and EF202924. <sup>k</sup> MW485232–MW485236, EF202908, and EF202911. <sup>l</sup> MW485232–MW485236, MH827557, and MH827559.

**Table S2.** Sample information.

| Strains | Location                 | GenBank Accession No. |                 |          |
|---------|--------------------------|-----------------------|-----------------|----------|
|         |                          | D1–D3 LSU rDNA        | D8–D10 LSU rDNA | SSU rDNA |
| GCBG01  | S3 (109.1301E, 21.0772N) | MW489525              | MW485226        | MW485232 |
| GCBG02  | S4 (109.1031E, 21.0700N) | MW489526              | MW485227        | MW485233 |
| GCBG03  | S4 (109.1031E, 21.0700N) | MW489527              | MW485228        | MW485234 |
| GCBG04  | S4 (109.1031E, 21.0700N) | MW489528              | MW485229        | MW485235 |
| GCBG05  | S7 (109.0844E, 21.0122N) | MW489529              | MW485230        | MW485236 |

**Table S3.** Primers and PCR product information.

| rDNA Region | Primers  | Primer Sequences               | PCR Products | References |
|-------------|----------|--------------------------------|--------------|------------|
| D1–D3 LSU   | D1R      | 5'-ACCCGCTGAATTTAAGCATA-3'     | 1384–1395 bp | [1]        |
|             | 28-1483R | 5'-GCTACTACCACCACCAAGATCTGC-3' |              |            |
| D8–D10 LSU  | FD8      | 5'-GGATTGGCTCTGAGGGTTGGG-3'    | 889–949 bp   | [2]        |
|             | RB       | 5'-GATAGGAAGAGCCGACATCGA-3'    |              |            |
| SSU         | EukA     | 5'-AACCTGGTTGATCCTGCCAGT-3'    | 1617–1788bp  | [3]        |
|             | EukB     | 5'-TGATCCTTCTGCAGGTTACCTAC-3'  |              |            |

## References

- Scholin, C.A.; Herzog, M.; Sogin, M.; Anderson, D.M. Identification of group and strain-specific genetic markers for globally distributed *Alexandrium* (Dinophyceae). II. Sequence analysis of a fragment of the LSU rRNA gene. *J. Phycol.* **1994**, *30*, 999–1011.
- Chinain, M.; Faust, M.A.; Pauillac, S. Morphology and molecular analyses of three toxic species of *Gambierdiscus* (Dinophyceae): *G. pacificus*, sp. nov., *G. australes*, sp. nov., and *G. polynesiensis*, sp. nov. *J. Phycol.* **1999**, *35*, 1282–1296.
- Medlin, L.; Elwood, H.J.; Stickel, S.; Sogin, M.L. The characterization of enzymatically amplified eukaryotic 16S-like rRNA-coding regions. *Gene* **1988**, *71*, 491–499.
